# Supplementary material
Source: Springer Nature journal article supplement (https://www.springermedizin.de/resource/supplementary/13046_2009_194_MOESM7_ESM.pdf/9661516)
Supplement: MOESM7 [file 9661516]

B

A

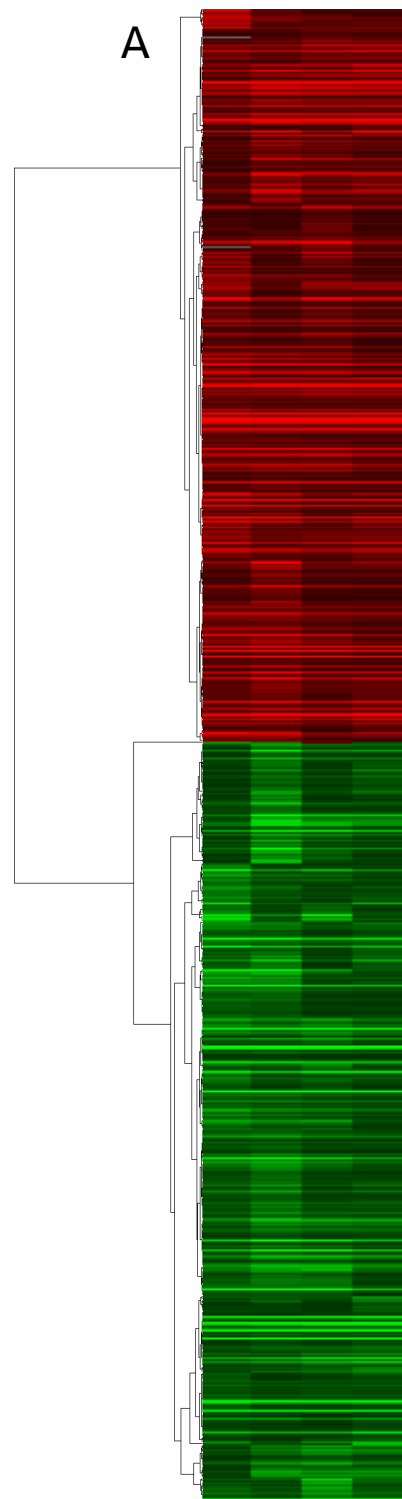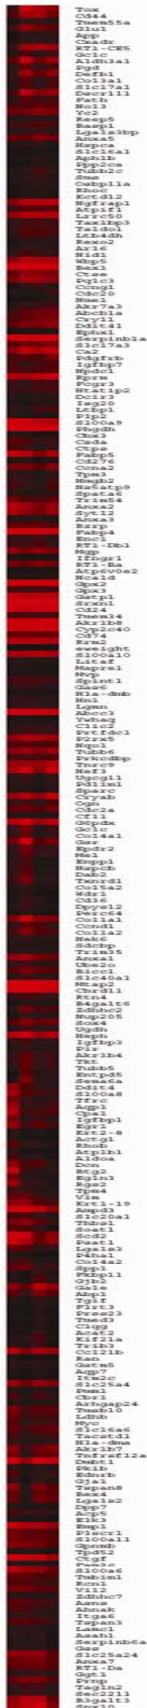

C

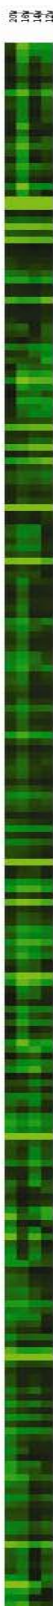

200 100 50 10  
 CYP2C7  
 SLC22A5  
 HSD17A  
 FABP4  
 HSD17A3  
 HMG  
 HMG2  
 HMG3  
 CYP2  
 CYP1  
 HMG5  
 HSD17A1  
 CYP2E1  
 CYP2  
 HMG4  
 HMG6  
 HMG7  
 HMG8  
 HMG9  
 HMG10  
 HMG11  
 HMG12  
 HMG13  
 HMG14  
 HMG15  
 HMG16  
 HMG17  
 HMG18  
 HMG19  
 HMG20  
 HMG21  
 HMG22  
 HMG23  
 HMG24  
 HMG25  
 HMG26  
 HMG27  
 HMG28  
 HMG29  
 HMG30  
 HMG31  
 HMG32  
 HMG33  
 HMG34  
 HMG35  
 HMG36  
 HMG37  
 HMG38  
 HMG39  
 HMG40  
 HMG41  
 HMG42  
 HMG43  
 HMG44  
 HMG45  
 HMG46  
 HMG47  
 HMG48  
 HMG49  
 HMG50  
 HMG51  
 HMG52  
 HMG53  
 HMG54  
 HMG55  
 HMG56  
 HMG57  
 HMG58  
 HMG59  
 HMG60  
 HMG61  
 HMG62  
 HMG63  
 HMG64  
 HMG65  
 HMG66  
 HMG67  
 HMG68  
 HMG69  
 HMG70  
 HMG71  
 HMG72  
 HMG73  
 HMG74  
 HMG75  
 HMG76  
 HMG77  
 HMG78  
 HMG79  
 HMG80  
 HMG81  
 HMG82  
 HMG83  
 HMG84  
 HMG85  
 HMG86  
 HMG87  
 HMG88  
 HMG89  
 HMG90  
 HMG91  
 HMG92  
 HMG93  
 HMG94  
 HMG95  
 HMG96  
 HMG97  
 HMG98  
 HMG99  
 HMG100
